# Supplementary material
Source: Research Square preprint supplement (doi:10.21203/rs.3.rs-9722243/v1)
Supplement: Supplementary file 1 [file 99fb7dd7cbf80a21c3d9d361.docx]

Supplementary Table S1

List of 145 Genes Analyzed in the Targeted-Gene Panel (PleSSion-Rapid-Neo).

| *ABL1* | *ACTN4* | *AKT1* | *AKT2* | *AKT3* | *ALK* | *APC* | *AR* |
| --- | --- | --- | --- | --- | --- | --- | --- |
| *ARAF* | *ARID1A* | *ARID2* | *ASXL1* | *ATM* | *ATRX* | *AXIN1* | *AXL* |
| *BAP1* | *BARD1* | *BCL2L11* | *BRAF* | *BRCA1* | *BRCA2* | *BRIP1* | *CARD11* |
| *CCND1* | *CD274* | *CD79B* | *CDH1* | *CDK12* | *CDK4* | *CDKN2A* | *CHEK2* |
| *CREBBP* | *CRKL* | *CSF1R* | *CTNNB1* | *CUL3* | *DDR2* | *DNMT3A* | *ECT2L* |
| *EGFR* | *ENO1* | *EP300* | *EPCAM* | *ERBB2* | *ERBB3* | *ERBB4* | *ESR1* |
| *EZH2* | *FANCA* | *FANCD2* | *FANCE* | *FBXW7* | *FGFR1* | *FGFR2* | *FGFR3* |
| *FGFR4* | *FH* | *FLT3* | *GNA11* | *GNAQ* | *GNAS* | *GRIN2A* | *HRAS* |
| *IDH1* | *IDH2* | *IGF1R* | *IGF2* | *IL7R* | *JAK1* | *JAK2* | *JAK3* |
| *KDM6A* | *KDR* | *KEAP1* | *KIT* | *KMT2D* | *KRAS* | *MAP2K1* | *MAP2K2* |
| *MAP2K4* | *MAP3K1* | *MAP3K4* | *MDM2* | *MDM4* | *MED12* | *MET* | *MLH1* |
| *MSH2* | *MSH6* | *MTOR* | *MYC* | *MYCN* | *MYD88* | *NF1* | *NF2* |
| *NFE2L2* | *NOTCH1* | *NOTCH2* | *NOTCH3* | *NPM1* | *NRAS* | *NRG1* | *NT5C2* |
| *NTRK1* | *NTRK2* | *NTRK3* | *PALB2* | *PBRM1* | *PDGFRA* | *PDGFRB* | *PIK3CA* |
| *PIK3R1* | *PIK3R2* | *PMS2* | *POLD1* | *POLE* | *PRKCI* | *PTCH1* | *PTEN* |
| *RAC1* | *RAC2* | *RAD51C* | *RAF1* | *RB1* | *RET* | *RHOA* | *ROS1* |
| *SETBP1* | *SETD2* | *SMAD4* | *SMARCA4* | *SMARCB1* | *SMO* | *SPOP* | *SRC* |
| *STAT3* | *STK11* | *TERT* | *TP53* | *TSC1* | *TSC2* | *VHL* | *WT1* |
| *XPC* |  |  |  |  |  |  |  |

Supplementary Table S2

Results of NGS of the 35 cases (PleSSion-Rapid-Neo). Case 33 was removed because of duplication. HD, homozygous deletion; Amp, amplification; TMB, tumor mutational burden.

| Case_No | WHO classification | | genomic profile | | | |
| --- | --- | --- | --- | --- | --- | --- |
| 2016 | 2021 | pathogenic mutation | HD | Amp | TMB |
| Case_1 | Ⅱ | 2 | *NF2* |  |  | 2.6 |
| Case_2 | Ⅲ | 3 |  |  |  | 1.5 |
| Case_3 | Ⅱ | 2 |  |  |  | 2.6 |
| Case_4 | Ⅱ | 2 |  |  |  | 1.8 |
| Case_5 | Ⅱ | 2 | *NF2* |  |  | 4 |
| Case_6 | Ⅱ | 2 |  |  |  | 2.2 |
| Case_7 | Ⅱ | 3 | *NF2, SMAD4, FBXW7, PIK3CA, TERT* |  |  | 2.9 |
| Case_8 | Ⅱ | 2 | *NF2* |  |  | 4.4 |
| Case_9 | Ⅱ | 3 |  | *CDKN2A* | *FGFR2* | 2.6 |
| Case_10 | Ⅱ | 2 | *NF2* |  |  | 2.6 |
| Case_11 | Ⅰ | 1 | *NF2* |  |  | 2.2 |
| Case_12 | Ⅰ | 1 |  |  |  | 2.9 |
| Case_13 | Ⅰ | 1 |  |  |  | 1.5 |
| Case_14 | Ⅰ | 1 | *NF2* |  |  | 1.8 |
| Case_15 | Ⅰ | 1 | *NF2* |  |  | 1.8 |
| Case_16 | Ⅱ | 2 | *NF2, KDM6A* |  |  | 70.6 |
| Case_17 | Ⅰ | 1 |  |  |  | 2.9 |
| Case_18 | Ⅰ | 1 | *PIK3CA* |  |  | 3.3 |
| Case_19 | Ⅰ | 1 | *NF2* |  |  | 4.4 |
| Case_20 | Ⅱ | 3 | *NF2, TERT* |  |  | 0.7 |
| Case_21 | Ⅰ | 1 | *NF2* |  |  | 10.7 |
| Case_22 | Ⅱ | 2 | *NF2, KMT2D* |  |  | 1.8 |
| Case_23 | Ⅱ | 2 | *NF2* |  |  | 2.6 |
| Case_24 | Ⅱ | 2 | *NF2, EP300* |  |  | 2.2 |
| Case_25 | Ⅱ | 2 |  | *BAP1, PBRM1* |  | 2.9 |
| Case_26 | Ⅱ | 2 | *FANCA* |  |  | 1.1 |
| Case_27 | Ⅱ | 2 | *NF2* |  |  | 1.1 |
| Case_28 | Ⅱ | 2 |  |  |  | 3.3 |
| Case_29 | Ⅲ | 3 | *NF2* |  |  | 2.6 |
| Case_30 | Ⅱ | 3 | *NF2, BRCA2* | *CDKN2A* |  | 7 |
| Case_31 | Ⅱ | 3 | *NF2* | *CDKN2A* |  | 1.1 |
| Case_32 | Ⅲ | 3 | *NF2* |  |  | 1.8 |
| Case_34 | Ⅱ | 2 |  |  |  | 2.2 |
| Case_35 | Ⅱ | 2 |  |  |  | 2.6 |
| Case_36 | Ⅲ | 3 |  |  |  | 1.8 |

Supplementary Table S3

Differentially expressed genes along tumor grade.

| Genes upregulated along meningioma grade (Grade 1 < Grade 2 < Grade 3) | | | | | | |
| --- | --- | --- | --- | --- | --- | --- |
| *BRCA1* | *BRCA2* | *BRIP1* | *CCNA2* | *CCNB1* | *CCNE2* | *CCNO* |
| *CDC25C* | *CDC6* | *CHEK1* | *COL6A6* | *DTX4* | *EDC3* | *EIF4EBP1* |
| *E2F1* | *FANCA* | *FANCB* | *FANCC* | *FGF3* | *HHIP* | *HISTH3B* |
| *HIST1H3H* | *HOXA9* | *HOXA10* | *HOXA11* | *MAP2K2* | *MCM2* | *MCM7* |
| *PITX2* | *PKMYT1* | *POLE2* | *PTCH1* | *PTPN5* | *PTTG2* | *RAD51* |
| *RFC3* | *RFC4* | *TTK* | *UBE2T* |  |  |  |

| Genes downregulated along meningioma grade (Grade 1> Grade 2 > Grade 3) | | | | | | |
| --- | --- | --- | --- | --- | --- | --- |
| *ANGPT1* | *BAMBI* | *BID* | *EP300* | *EPHA2* | *FAS* | *GRIA3* |
| *HDAC1* | *IL1R1* | *LEPR* | *MAPK10* | *NOTCH2* | *PLCE1* | *PPP3CB* |
| *PRKAA2* | *RAC1* | *RUNX1* | *SFRP1* | *SOCS2* | *SOS2* | *TET2* |
| *TLR4* |  |  |  |  |  |  |

Supplementary Table S4

Differentially expressed genes between Mid and Low groups of Cluster M sorted by p value. (top 30). logFC (Mid vs Low): log2 fold change in gene expression between the Mid and Low groups.

| Gene Symbol | Mean (All) | Mean (Low) | Mean (Mid) | logFC  (Mid vs Low) | p value |
| --- | --- | --- | --- | --- | --- |
| *BRIP1* | 7.46 | 6.23 | 7.58 | 1.36 | 5.29E-05 |
| *EP300* | 10.34 | 10.76 | 9.97 | -0.79 | 5.29E-05 |
| *TTK* | 6.72 | 5.45 | 6.97 | 1.51 | 5.29E-05 |
| *BRCA1* | 7.65 | 6.98 | 7.82 | 0.84 | 1.06E-04 |
| *CACNA2D1* | 9.64 | 10.51 | 8.82 | -1.68 | 1.85E-04 |
| *CDC25C* | 5.82 | 4.54 | 5.92 | 1.38 | 1.85E-04 |
| *CREB5* | 8.88 | 9.45 | 7.81 | -1.64 | 1.85E-04 |
| *ZIC2* | 12.91 | 12.61 | 13.48 | 0.87 | 1.85E-04 |
| *DKK2* | 9.48 | 7.43 | 12.27 | 4.83 | 3.18E-04 |
| *JAK1* | 10.87 | 11.24 | 10.37 | -0.87 | 3.18E-04 |
| *MAP3K1* | 10.15 | 10.44 | 9.82 | -0.62 | 3.18E-04 |
| *MCM2* | 7.84 | 6.89 | 7.87 | 0.98 | 3.18E-04 |
| *CASP7* | 8.54 | 8.97 | 7.80 | -1.17 | 5.03E-04 |
| *FANCB* | 6.27 | 5.43 | 6.28 | 0.85 | 5.03E-04 |
| *CCNB1* | 8.89 | 7.76 | 8.77 | 1.02 | 7.94E-04 |
| *CDC25A* | 7.11 | 6.52 | 7.49 | 0.98 | 7.94E-04 |
| *HDAC1* | 10.2 | 10.74 | 9.80 | -0.94 | 7.94E-04 |
| *PPARGC1A* | 10.9 | 10.48 | 12.22 | 1.74 | 7.94E-04 |
| *PRPF38A* | 10.24 | 10.55 | 9.84 | -0.71 | 7.94E-04 |
| *GNG12* | 11.04 | 11.99 | 10.67 | -1.32 | 1.19E-03 |
| *HOXA11* | 3.77 | 3.17 | 4.50 | 1.33 | 1.19E-03 |
| *IL3RA* | 6.83 | 7.28 | 6.05 | -1.23 | 1.19E-03 |
| *CHEK1* | 7.66 | 6.83 | 7.63 | 0.80 | 1.77E-03 |
| *E2F1* | 7.14 | 6.22 | 7.26 | 1.04 | 1.77E-03 |
| *FGF19* | 3.50 | 3.01 | 3.88 | 0.88 | 1.77E-03 |
| *PDGFD* | 10.01 | 11.13 | 9.13 | -2.01 | 1.77E-03 |
| *MRPS5* | 11.06 | 10.72 | 11.33 | 0.61 | 1.77E-03 |
| *ANGPT1* | 6.47 | 7.57 | 5.83 | -1.74 | 2.54E-03 |
| *BCL2L1* | 11.01 | 10.57 | 11.17 | 0.60 | 2.54E-03 |
| *BRCA2* | 7.32 | 6.55 | 7.33 | 0.78 | 2.54E-03 |

Supplementary Table S5

Differentially expressed genes between High and Mid groups of Cluster M sorted by p value. (top 30). logFC (High vs Mid): log2 fold change in gene expression between the High and Mid groups.

| Gene Symbol | Mean (All) | Mean (Mid) | Mean (High) | logFC  (High vs Mid) | p value |
| --- | --- | --- | --- | --- | --- |
| *MCM2* | 7.84 | 7.87 | 8.98 | 1.11 | 8.23E-05 |
| *TTK* | 6.72 | 6.97 | 8.05 | 1.09 | 8.23E-05 |
| *CCNE2* | 6.51 | 6.53 | 7.60 | 1.07 | 3.29E-04 |
| *CHEK1* | 7.66 | 7.63 | 8.69 | 1.06 | 3.29E-04 |
| *IDH2* | 9.12 | 8.59 | 9.50 | 0.92 | 5.76E-04 |
| *CDC25C* | 5.82 | 5.92 | 7.30 | 1.38 | 9.87E-04 |
| *MCM5* | 7.65 | 7.23 | 8.00 | 0.77 | 9.87E-04 |
| *PTTG2* | 8.20 | 8.08 | 9.36 | 1.28 | 9.87E-04 |
| *U2AF1* | 12.31 | 11.92 | 12.52 | 0.60 | 9.87E-04 |
| *BAMBI* | 7.93 | 8.70 | 5.73 | -2.97 | 1.56E-03 |
| *BRIP1* | 7.46 | 7.58 | 8.85 | 1.27 | 1.56E-03 |
| *FANCA* | 5.91 | 5.79 | 7.04 | 1.26 | 1.56E-03 |
| *BRCA1* | 7.65 | 7.82 | 8.32 | 0.50 | 2.47E-03 |
| *CCNA2* | 7.95 | 7.77 | 9.16 | 1.40 | 2.47E-03 |
| *CCNB1* | 8.89 | 8.77 | 10.39 | 1.62 | 2.47E-03 |
| *FANCB* | 6.27 | 6.28 | 7.28 | 1.00 | 2.47E-03 |
| *IL3RA* | 6.83 | 6.05 | 6.98 | 0.93 | 2.47E-03 |
| *CDC6* | 7.89 | 7.88 | 9.00 | 1.12 | 3.32E-03 |
| *AXIN2* | 7.85 | 7.33 | 8.75 | 1.42 | 3.70E-03 |
| *HELLS* | 8.60 | 8.23 | 9.42 | 1.19 | 3.70E-03 |
| *SIN3A* | 10.19 | 9.90 | 10.41 | 0.51 | 3.70E-03 |
| *BRCA2* | 7.32 | 7.33 | 8.24 | 0.92 | 5.51E-03 |
| *DNMT1* | 9.94 | 9.70 | 10.35 | 0.65 | 5.51E-03 |
| *DUSP6* | 10.73 | 11.14 | 9.86 | -1.28 | 5.51E-03 |
| *EYA1* | 10.1 | 11.3 | 7.93 | -3.36 | 5.51E-03 |
| *IGF1R* | 12.0 | 12.49 | 11.35 | -1.13 | 5.51E-03 |
| *KAT2B* | 10.57 | 11.11 | 9.70 | -1.41 | 5.51E-03 |
| *KMT2C* | 11.13 | 10.86 | 11.28 | 0.42 | 5.51E-03 |
| *MLLT3* | 8.33 | 8.49 | 7.84 | -0.64 | 5.51E-03 |
| *NCOR1* | 11.99 | 11.84 | 12.13 | 0.28 | 5.51E-03 |

Supplementary Table S6

Gene sets up or down-regulated in Mid versus Low group of Cluster M by GSEA sorted by p value (top 30). ES, enrichment score; NES, normalized enrichment score; log2err, log2-transformed standard error. Gene sets were obtained from Gene Ontology Biological Process (GO) and the Molecular Signatures Database (MSigDB, Hallmark collection).

| Gene set collection | Pathway | p value | Adjusted  p value | log2err | ES | NES |
| --- | --- | --- | --- | --- | --- | --- |
| GO | vasculature development | 5.61E-07 | 0.0016 | 0.659 | -0.489 | -1.940 |
| GO | circulatory system development | 1.18E-06 | 0.0017 | 0.644 | -0.442 | -1.829 |
| GO | regulation of immune system process | 2.01E-06 | 0.0019 | 0.627 | -0.451 | -1.839 |
| GO | enzyme linked receptor protein signaling pathway | 4.77E-06 | 0.0034 | 0.611 | -0.430 | -1.774 |
| GO | locomotion | 1.02E-05 | 0.0058 | 0.593 | -0.429 | -1.762 |
| GO | myeloid leukocyte migration | 1.61E-05 | 0.0076 | 0.576 | -0.681 | -2.092 |
| GO | mapk cascade | 2.68E-05 | 0.0108 | 0.576 | -0.438 | -1.771 |
| GO | regulation of locomotion | 4.47E-05 | 0.0158 | 0.557 | -0.430 | -1.740 |
| GO | positive regulation of locomotion | 5.63E-05 | 0.0173 | 0.557 | -0.466 | -1.802 |
| GO | regulation of intracellular signal transduction | 6.13E-05 | 0.0173 | 0.538 | -0.394 | -1.654 |
| GO | cell chemotaxis | 7.04E-05 | 0.0181 | 0.538 | -0.602 | -1.992 |
| GO | cell cycle checkpoint signaling | 8.82E-05 | 0.0191 | 0.538 | 0.634 | 2.176 |
| GO | leukocyte migration | 9.63E-05 | 0.0191 | 0.538 | -0.578 | -1.963 |
| GO | positive regulation of immune system process | 9.01E-05 | 0.0191 | 0.538 | -0.440 | -1.736 |
| GO | response to growth factor | 1.02E-04 | 0.0191 | 0.538 | -0.426 | -1.724 |
| GO | regulation of vasculature development | 1.11E-04 | 0.0195 | 0.538 | -0.532 | -1.869 |
| GO | cell motility | 1.32E-04 | 0.0220 | 0.519 | -0.392 | -1.615 |
| GO | leukocyte chemotaxis | 1.66E-04 | 0.0261 | 0.519 | -0.651 | -1.954 |
| Hallmark | E2F targets | 2.00E-03 | 0.0310 | 0.432 | 0.503 | 1.823 |
| Hallmark | IL6 JAK STAT3 signaling | 1.94E-03 | 0.0310 | 0.455 | -0.575 | -1.801 |
| Hallmark | TNFA signaling via NFKB | 2.16E-03 | 0.0310 | 0.432 | -0.526 | -1.757 |
| GO | response to endogenous stimulus | 2.12E-04 | 0.0315 | 0.519 | -0.375 | -1.593 |
| GO | regulation of leukocyte migration | 2.49E-04 | 0.0352 | 0.498 | -0.630 | -1.927 |
| GO | positive regulation of leukocyte migration | 2.69E-04 | 0.0361 | 0.498 | -0.647 | -1.921 |
| GO | blood vessel morphogenesis | 3.13E-04 | 0.0402 | 0.498 | -0.442 | -1.738 |
| GO | proteoglycan metabolic process | 3.33E-04 | 0.0409 | 0.498 | -0.904 | -1.799 |
| GO | regulation of osteoblast differentiation | 3.89E-04 | 0.0458 | 0.498 | -0.592 | -1.908 |
| GO | circulatory system process | 5.96E-04 | 0.0673 | 0.477 | -0.562 | -1.845 |
| GO | anatomical structure formation involved in morphogenesis | 6.66E-04 | 0.0723 | 0.477 | -0.380 | -1.563 |
| GO | cellular response to starvation | 8.55E-04 | 0.0730 | 0.477 | -0.671 | -1.853 |

Supplementary Table S7

Gene sets up or down-regulated in High versus Mid group of Cluster M by GSEA sorted by p value (top 30). ES, enrichment score; NES, normalized enrichment score; log2err, log2-transformed standard error. Gene sets were obtained from Gene Ontology Biological Process (GO) and the Molecular Signatures Database (MSigDB, Hallmark collection).

| Gene set collection | Pathway | p value | Adjusted  p value | log2err | ES | NES |
| --- | --- | --- | --- | --- | --- | --- |
| GO | chromosome organization | 1.93E-07 | 0.0005 | 0.690 | 0.577 | 2.298 |
| GO | dna replication | 4.44E-07 | 0.0006 | 0.675 | 0.657 | 2.301 |
| Hallmark | G2M checkpoint | 7.67E-05 | 0.0033 | 0.538 | 0.609 | 2.093 |
| Hallmark | E2F targets | 2.09E-04 | 0.0045 | 0.519 | 0.553 | 1.923 |
| GO | regulation of dna replication | 2.74E-05 | 0.0258 | 0.576 | 0.697 | 2.170 |
| GO | dna templated dna replication | 1.07E-04 | 0.0433 | 0.538 | 0.670 | 2.143 |
| GO | meiotic cell cycle | 1.06E-04 | 0.0433 | 0.538 | 0.612 | 2.058 |
| GO | meiotic cell cycle process | 8.63E-05 | 0.0433 | 0.538 | 0.668 | 2.168 |
| GO | positive regulation of cell population proliferation | 8.87E-05 | 0.0433 | 0.538 | -0.413 | -1.680 |
| GO | meiosis i cell cycle process | 1.56E-04 | 0.0490 | 0.519 | 0.735 | 2.080 |
| GO | positive regulation of epithelial cell proliferation | 1.47E-04 | 0.0490 | 0.519 | -0.558 | -1.907 |
| GO | dna repair | 2.55E-04 | 0.0718 | 0.498 | 0.452 | 1.826 |
| GO | recombinational repair | 2.91E-04 | 0.0747 | 0.498 | 0.692 | 2.052 |
| GO | dna metabolic process | 3.44E-04 | 0.0762 | 0.498 | 0.380 | 1.647 |
| GO | dna recombination | 3.51E-04 | 0.0762 | 0.498 | 0.549 | 1.924 |
| GO | enteroendocrine cell differentiation | 4.55E-04 | 0.0763 | 0.498 | -0.798 | -1.874 |
| GO | neurogenesis | 4.60E-04 | 0.0763 | 0.498 | -0.390 | -1.578 |
| GO | organelle fission | 4.60E-04 | 0.0763 | 0.498 | 0.502 | 1.894 |
| GO | type b pancreatic cell differentiation | 4.21E-04 | 0.0763 | 0.498 | -0.813 | -1.869 |
| GO | cell cell signaling | 5.49E-04 | 0.0861 | 0.477 | -0.382 | -1.555 |
| GO | type b pancreatic cell development | 6.42E-04 | 0.0953 | 0.477 | -0.817 | -1.839 |
| GO | developmental growth involved in morphogenesis | 7.21E-04 | 0.1015 | 0.477 | -0.589 | -1.851 |
| GO | negative regulation of extrinsic apoptotic signaling pathway | 7.55E-04 | 0.1015 | 0.477 | -0.632 | -1.847 |
| Hallmark | MYC targets v1 | 7.78E-03 | 0.1116 | 0.407 | 0.623 | 1.757 |
| GO | cellular response to dna damage stimulus | 1.26E-03 | 0.1488 | 0.455 | 0.361 | 1.552 |
| GO | cell cycle process | 1.31E-03 | 0.1488 | 0.455 | 0.347 | 1.522 |
| GO | epithelial cell proliferation | 1.32E-03 | 0.1488 | 0.455 | -0.424 | -1.628 |
| GO | negative regulation of growth | 1.30E-03 | 0.1488 | 0.455 | -0.554 | -1.786 |
| GO | positive chemotaxis | 1.45E-03 | 0.1571 | 0.455 | -0.713 | -1.788 |
| GO | columnar cuboidal epithelial cell development | 1.71E-03 | 0.1765 | 0.455 | -0.766 | -1.797 |

Supplementary Table S8

Differentially enriched gene sets in the two clusters of hierarchical clustering based on enrichment scores for Hallmark gene sets (top 20). −log10(p adj) represents the negative logarithm (base 10) of the adjusted p value. Gene sets were obtained from the Molecular Signatures Database (MSigDB, Hallmark collection).

| Pathway | p value | Adjusted  p value | log2FC | −log10(p adj) |
| --- | --- | --- | --- | --- |
| MYC targets V1 | 6.57E-08 | 3.29E-06 | -1.584 | 7.182 |
| E2F targets | 1.25E-06 | 3.12E-05 | -1.697 | 5.903 |
| G2M checkpoint | 6.38E-06 | 1.06E-04 | -1.683 | 5.195 |
| xenobiotic metabolism | 9.14E-06 | 1.14E-04 | 1.441 | 5.039 |
| complement | 4.45E-05 | 4.45E-04 | 1.167 | 4.352 |
| MYC targets V2 | 1.70E-04 | 1.41E-03 | -0.889 | 3.771 |
| IL6 JAK STAT3 signaling | 2.16E-04 | 1.55E-03 | 1.201 | 3.665 |
| dna repair | 4.34E-04 | 2.71E-03 | -1.072 | 3.363 |
| apical surface | 1.81E-03 | 1.01E-02 | -1.003 | 2.742 |
| inflammatory response | 2.61E-03 | 1.31E-02 | 1.063 | 2.583 |
| UV response DN | 4.40E-03 | 2.00E-02 | 0.682 | 2.357 |
| NOTCH signaling | 9.71E-03 | 4.04E-02 | 0.861 | 2.013 |
| androgen response | 1.50E-02 | 4.69E-02 | 0.736 | 1.824 |
| coagulation | 1.30E-02 | 4.69E-02 | 0.967 | 1.886 |
| bile acid metabolism | 1.50E-02 | 4.69E-02 | 0.872 | 1.824 |
| allograft rejection | 1.50E-02 | 4.69E-02 | 0.741 | 1.824 |
| interferon gamma response | 1.72E-02 | 5.07E-02 | 0.853 | 1.764 |
| adipogenesis | 2.26E-02 | 6.27E-02 | 0.707 | 1.647 |
| peroxisome | 4.73E-02 | 1.24E-01 | -0.632 | 1.325 |
| p53 pathway | 6.61E-02 | 1.65E-01 | 0.686 | 1.180 |
